# Supplementary material for: Evaluating Statistical Methods Using Plasmode Data Sets in the Age of Massive Public Databases: An Illustration Using False Discovery Rates
Source: PubMed Central journal article supplement (PMC2409977; doi:10.1371/journal.pgen.1000098), 2008-06-20

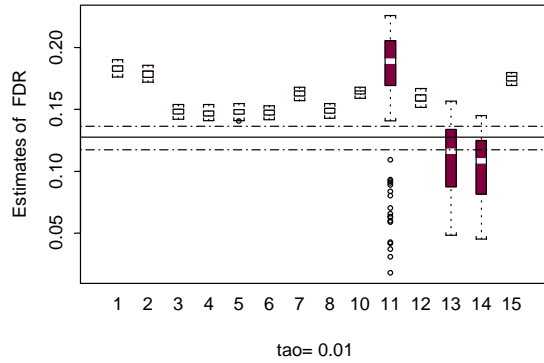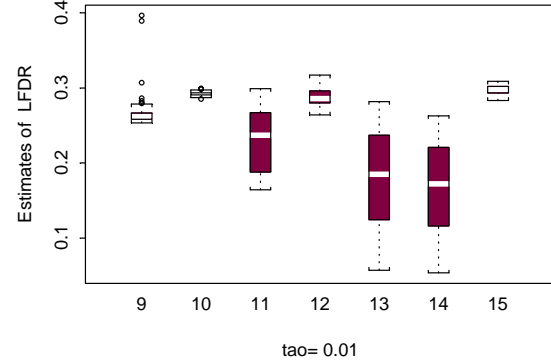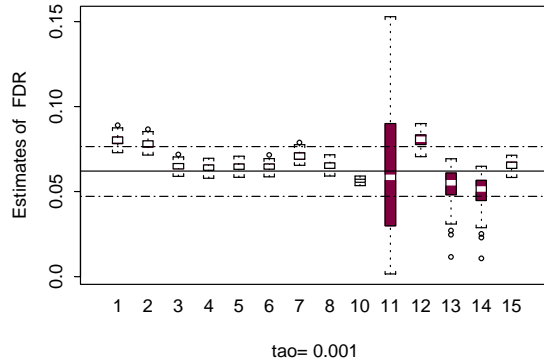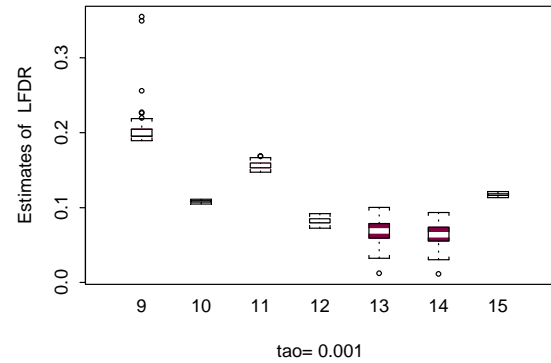

Supplement: pgen.1000098.s003.pdf [file pgen.1000098.s003.pdf]
