# Supplementary material for: Evaluating Statistical Methods Using Plasmode Data Sets in the Age of Massive Public Databases: An Illustration Using False Discovery Rates
Source: PubMed Central journal article supplement (PMC2409977; doi:10.1371/journal.pgen.1000098), 2008-06-20
Supplement: pgen.1000098.s007.pdf [file pgen.1000098.s007.pdf]

**Table S1:** Comparison of methods for template data set 1 (Control versus EGCG treatment group for day 21) analyzed on the MASS 5 processed images. Estimates of  $\pi_0$  and for FDR, and LFDR computed at two thresholds for those methods that provide estimates. Estimates are given as NA for those methods that do not produce an estimate for one or the other.

| Method      | $\hat{\pi}_0$ | $\tau = 0.01$   |                  | $\tau = 0.001$  |                  |
|-------------|---------------|-----------------|------------------|-----------------|------------------|
|             |               | $\widehat{FDR}$ | $\widehat{LFDR}$ | $\widehat{FDR}$ | $\widehat{LFDR}$ |
| 1 (BH)      | 1             | 0.197           | NA               | 0.077           | NA               |
| 2 (BH-A)    | 0.982         | 0.194           | NA               | 0.076           | NA               |
| 3 (M-L)     | 0.787         | 0.155           | NA               | 0.061           | NA               |
| 4 (ST-S)    | 0.781         | 0.154           | NA               | 0.060           | NA               |
| 5 (ST- B)   | 0.789         | 0.156           | NA               | 0.061           | NA               |
| 6 (P-plot)  | 0.786         | 0.155           | NA               | 0.061           | NA               |
| 7 (LBE)     | 0.826         | 0.163           | NA               | 0.064           | NA               |
| 8 (Convest) | 0.789         | 0.156           | NA               | 0.061           | NA               |
| 9 (SEP)     | 0.7906        | NA              | 0.238            | NA              | 0.190            |
| 10 (BUM)    | 0.742         | 0.147           | 0.252            | 0.055           | 0.098            |
| 11(SPLOSH)  | 0.784         | 0.046           | 0.161            | 0.035           | 0.147            |
| 12 (L-L)    | 0.790         | 0.164           | 0.261            | 0.082           | 0.083            |
| 13 (MGF)    | 0.837         | 0.049           | 0.069            | 0.037           | 0.052            |
| 14 (PRE)    | 0.782         | 0.046           | 0.065            | 0.034           | 0.048            |
| 15( HDBMix) | 0.801         | 0.160           | 0.265            | 0.062           | 0.108            |
