# Supplementary material for: Evaluating Statistical Methods Using Plasmode Data Sets in the Age of Massive Public Databases: An Illustration Using False Discovery Rates
Source: PubMed Central journal article supplement (PMC2409977; doi:10.1371/journal.pgen.1000098), 2008-06-20
Supplement: pgen.1000098.s008.pdf [file pgen.1000098.s008.pdf]

**Table S2:** Comparison of methods for template data set 2 (Control versus Resveratrol treatment group for day 50) analyzed on the MASS 5 processed images. Table entries are those described in Table 1.

| Method      | $\hat{\pi}_0$ | $\tau = 0.01$   |                  | $\tau = 0.001$  |                  |
|-------------|---------------|-----------------|------------------|-----------------|------------------|
|             |               | $\widehat{FDR}$ | $\widehat{LFDR}$ | $\widehat{FDR}$ | $\widehat{LFDR}$ |
| 1 (BH)      | 1             | 0.711           | NA               | 0.536           | NA               |
| 2 (BH-A)    | 0.999         | 0.711           | NA               | 0.536           | NA               |
| 3 (M-L)     | 0.873         | 0.620           | NA               | 0.468           | NA               |
| 4 (ST-S)    | 0.870         | 0.614           | NA               | 0.456           | NA               |
| 5 (ST- B)   | 0.876         | 0.619           | NA               | 0.459           | NA               |
| 6 (P-plot)  | 0.878         | 0.624           | NA               | 0.471           | NA               |
| 7 (LBE)     | 0.933         | 0.659           | NA               | 0.489           | NA               |
| 8 (Convest) | 0.870         | 0.618           | NA               | 0.466           | NA               |
| 9 (SEP)     | 0.881         | NA              | 0.666            | NA              | 0.660            |
| 10 (BUM)    | 1             | 1               | 1                | 1               | 1                |
| 11(SPLOSH)  | 0.852         | 0.597           | 0.605            | 0.517           | 0.589            |
| 12 (L-L)    | 0.855         | 0.645           | 0.648            | 0.642           | 0.642            |
| 13 (MGF)    | 0.924         | 0.587           | 0.684            | 0.477           | 0.515            |
| 14 (PRE)    | 0.865         | 0.550           | 0.640            | 0.446           | 0.482            |
| 15( HDBMix) | 0.875         | 0.609           | 0.624            | 0.579           | 0.592            |
